# Supplementary material
Source: publisher figshare collection journal article supplement (https://karger.figshare.com/ndownloader/files/25029161)
Supplement: Supplementary file 1 [file 25029161]

Supplementary table 1. Association between DL and the use of PPI.

|  | Demarcation line | | *P* value |
| --- | --- | --- | --- |
| Present  n = 60 | Absent  n = 65 |
| Proton pump inhibitor  　Present  　Absent | 15 (25)  45 (75) | 17 (26)  48 (74) | 1 |

Data are presented as *n* (%).
